# Supplementary material for: Defining the larval habitat: abiotic and biotic parameters associated with Anopheles farauti productivity
Source: Springer Nature journal article supplement (doi:10.1186/s12936-019-3049-7), 2019-12-01
Supplement: MOESM1 [file 17661512]

## Additional file 1

**Table S1.** The definitions and classifications for environmental parameters of larval habitats.

| <b>Environmental parameter</b> | <b>Classifications</b>                                                                                                                              | <b>Definitions</b>                                                                                                                                                                                                                                            |
|--------------------------------|-----------------------------------------------------------------------------------------------------------------------------------------------------|---------------------------------------------------------------------------------------------------------------------------------------------------------------------------------------------------------------------------------------------------------------|
| Habitat                        | <i>Broad classification of the form of each larval habitat (single choice)</i>                                                                      |                                                                                                                                                                                                                                                               |
|                                | Transient pools                                                                                                                                     | Temporary pool of water formed in surface depressions.                                                                                                                                                                                                        |
|                                | Lagoon or swamp                                                                                                                                     | Low area filled with stagnant water, could be freshwater or a brackish water marsh. Note that this includes blocked stream mouths, were a body of ground water forms when the flow is prevented from discharging by an obstruction (ie., sand bar or similar) |
|                                | Drains                                                                                                                                              | A narrow channel parallel to a road or field capable of holding or carrying away water                                                                                                                                                                        |
|                                | Man-made holes                                                                                                                                      | Artificial body of water created by humans, this includes construction pits, concrete ponds, tyre tracks and water wells                                                                                                                                      |
|                                | Water storage containers                                                                                                                            | Man-made tanks/barrels for holding water                                                                                                                                                                                                                      |
|                                | Riverine habitat                                                                                                                                    | A narrow natural flowing water body                                                                                                                                                                                                                           |
|                                | Pond                                                                                                                                                | Permanent (or semi-permanent) natural body of still ground freshwater                                                                                                                                                                                         |
|                                | Rock pool                                                                                                                                           | A pool of water that collects in a depression in a rock                                                                                                                                                                                                       |
|                                | Substrate                                                                                                                                           | <i>Description of the base of the larval habitat (multiple choice) [17]</i>                                                                                                                                                                                   |
| Rocks                          |                                                                                                                                                     | Stones >2 cm in diameter                                                                                                                                                                                                                                      |
| Gravel                         |                                                                                                                                                     | Stones from 4 mm to 2 cm in diameter                                                                                                                                                                                                                          |
| Sand                           |                                                                                                                                                     | Stones from 0.05 and 4 mm in diameter                                                                                                                                                                                                                         |
| Silt                           |                                                                                                                                                     | Fine Particles of sand, clay, or other materials <0.05 mm in diameter deposited as a sediment                                                                                                                                                                 |
| Water depth                    | <i>Distance from the bottom to the surface of an aquatic habitat measured approximately 30 cm from the perimeter of the habitat (single choice)</i> |                                                                                                                                                                                                                                                               |
|                                | 0 – 4 cm                                                                                                                                            | Water is less than and including 4 cm deep                                                                                                                                                                                                                    |
|                                | 5 – 9 cm                                                                                                                                            | Water is between 5 and 9 cm deep                                                                                                                                                                                                                              |
|                                | 10 – 14 cm                                                                                                                                          | Water is between 10 and 14 cm deep                                                                                                                                                                                                                            |
|                                | 15 – 19 cm                                                                                                                                          | Water is between 15 and 19 cm deep                                                                                                                                                                                                                            |

| <b>Environmental parameter</b> | <b>Classifications</b>                                                                                              | <b>Definitions</b>                                                                    |
|--------------------------------|---------------------------------------------------------------------------------------------------------------------|---------------------------------------------------------------------------------------|
|                                | >20 cm                                                                                                              | Water is more than 20 cm deep                                                         |
| Perimeter                      | <i>Perimeter of the habitat, described by its size (single choice)</i>                                              |                                                                                       |
|                                | Small                                                                                                               | Habitat with a circumference of less than 10 m                                        |
|                                | Medium                                                                                                              | Habitat with a circumference between 10 and 100 m                                     |
|                                | Large                                                                                                               | Habitat with a circumference over 100 m                                               |
| Bank slope                     | <i>The gradient of the land bank at the point where it meets the water surface (single choice) [30] (Figure A1)</i> |                                                                                       |
|                                | Gentle                                                                                                              | When the angle of ground forming the sides of a larval habitat ranges from 0 – 19°    |
|                                | Moderate                                                                                                            | When the angle of ground forming the sides of a larval habitat ranges from 20 – 49°   |
|                                | Steep                                                                                                               | When the angle of ground forming the sides of a larval habitat ranges from 50 – 90°   |
| Canopy                         | <i>Vegetation coverage above the sampling site (single choice)</i>                                                  |                                                                                       |
|                                | None                                                                                                                | Absence of any vegetation shading a larval habitat                                    |
|                                | Bush                                                                                                                | Small- to medium-sized woody plant overhanging the larval habitat                     |
|                                | Tree                                                                                                                | Woody plant more than 6 m tall overhanging the larval habitat                         |
| Sunlight                       | <i>Amount of natural illumination of the larval habitat during the day (single choice)</i>                          |                                                                                       |
|                                | No sun                                                                                                              | Absence of direct solar light                                                         |
|                                | Partial sun                                                                                                         | Variable solar illumination during daytime due to partial obstruction by vegetation   |
|                                | Full sun                                                                                                            | Condition whereby the habitat receives complete solar illumination throughout daytime |
| Vegetation                     | <i>Types of plants living in the sample site (multiple choice)</i>                                                  |                                                                                       |
|                                | None                                                                                                                | Absence of plants                                                                     |
|                                | Trees                                                                                                               | Woody vegetation >6 m tall                                                            |
|                                | Bushes                                                                                                              | Woody vegetation <6m tall                                                             |
|                                | Algae                                                                                                               | Any of a large, diverse group of photosynthetic eukaryotic organisms                  |
|                                | Floating                                                                                                            | Plant matter suspended on the habitat surface                                         |

| <b>Environmental parameter</b> | <b>Classifications</b>                                                                                                                     | <b>Definitions</b>                                                                                                     |
|--------------------------------|--------------------------------------------------------------------------------------------------------------------------------------------|------------------------------------------------------------------------------------------------------------------------|
|                                | Emergent                                                                                                                                   | Woody or non-woody plants rooted in the bottom of the larval habitat that rise above the surface of the larval habitat |
| Debris                         | <i>The remains of vegetation (non-living) and man-made materials (paper, plastic, metal) in or on the larval habitat (multiple choice)</i> |                                                                                                                        |
|                                | None                                                                                                                                       | Absence of natural or man-made materials                                                                               |
|                                | Dead plant material                                                                                                                        | Non-living vegetative material present                                                                                 |
|                                | Man-made material                                                                                                                          | Plastic, metal or paper or other non-natural materials processed by humans                                             |
|                                | Scum                                                                                                                                       | Surface film composed of dirt, organic materials or froth (including biofilms) on the larval habitat                   |
|                                | Pumice                                                                                                                                     | Buoyant rocks/gravel present on the habitat surface                                                                    |
| Predators                      | <i>Animals that naturally prey on immature mosquitoes (multiple choice)</i>                                                                |                                                                                                                        |
|                                | Fish                                                                                                                                       | Gill-bearing aquatic animals lacking limbs with digits                                                                 |
|                                | Tadpoles                                                                                                                                   | Immature amphibians                                                                                                    |
|                                | Dragonfly nymphs                                                                                                                           | Nymphs of the order Odonata, family Anisoptera                                                                         |
|                                | Water striders                                                                                                                             | Insects of the family Gerridae                                                                                         |
|                                | Other                                                                                                                                      | Carnivorous animals not in the above classifications                                                                   |
