# Supplementary material for: Defining the larval habitat: abiotic and biotic parameters associated with Anopheles farauti productivity
Source: Springer Nature journal article supplement (doi:10.1186/s12936-019-3049-7), 2019-12-01

## Additional file 2

**Figure S1:** Comparison of the influence of abiotic parameters that were analysed categorically on the density of *An. farauti* larvae in aquatic habitats.

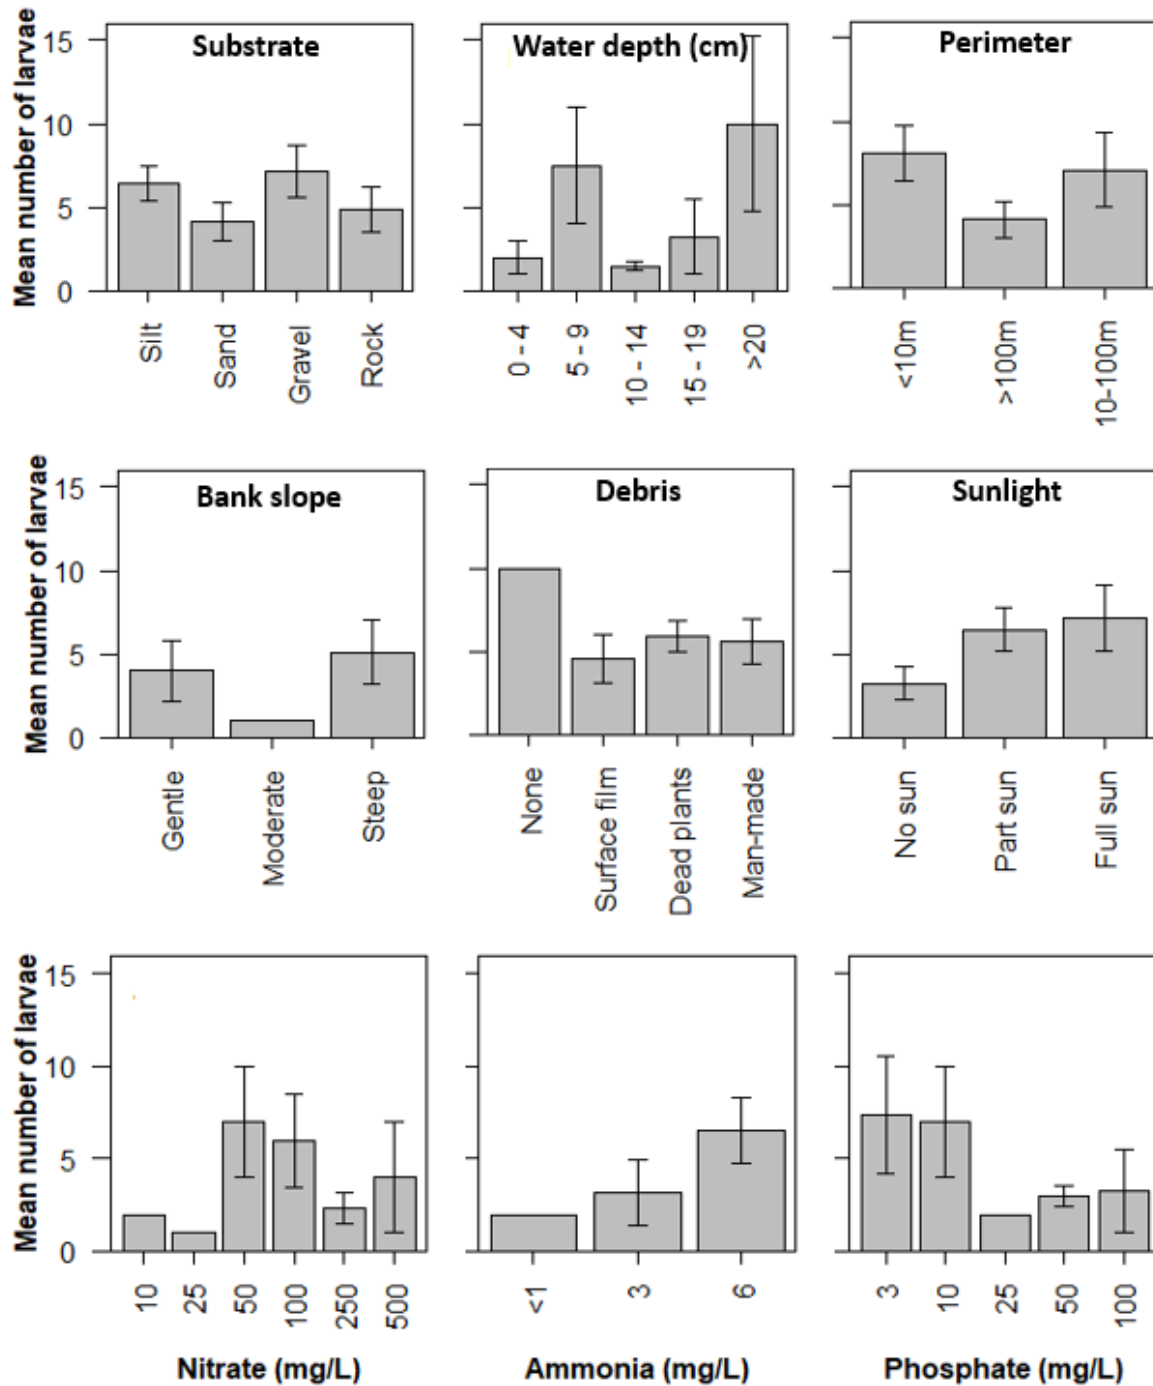

**Figure S2.** Comparison of the influence of abiotic parameters that were analysed continuously on the density of *An. farauti* larvae in aquatic habitats.

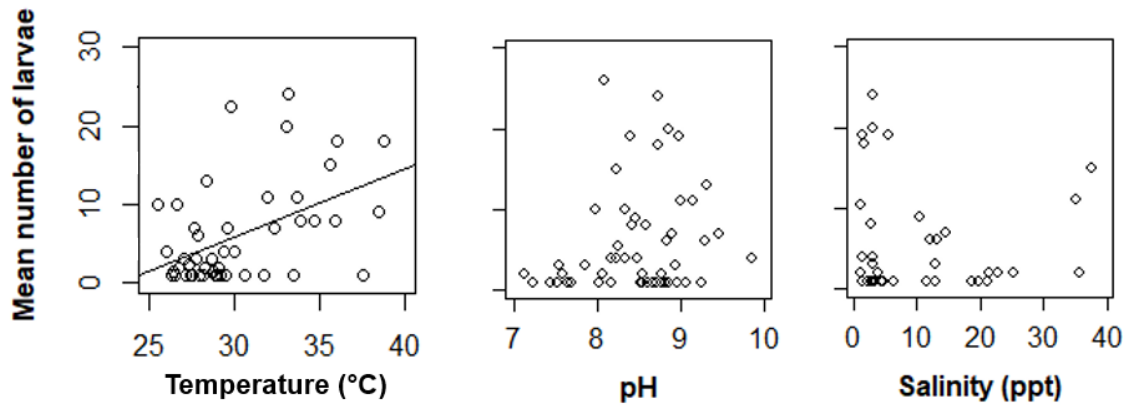

**Figure S3.** Comparison of the influence of biotic parameters on the density of *An. farauti* larvae in aquatic habitats.

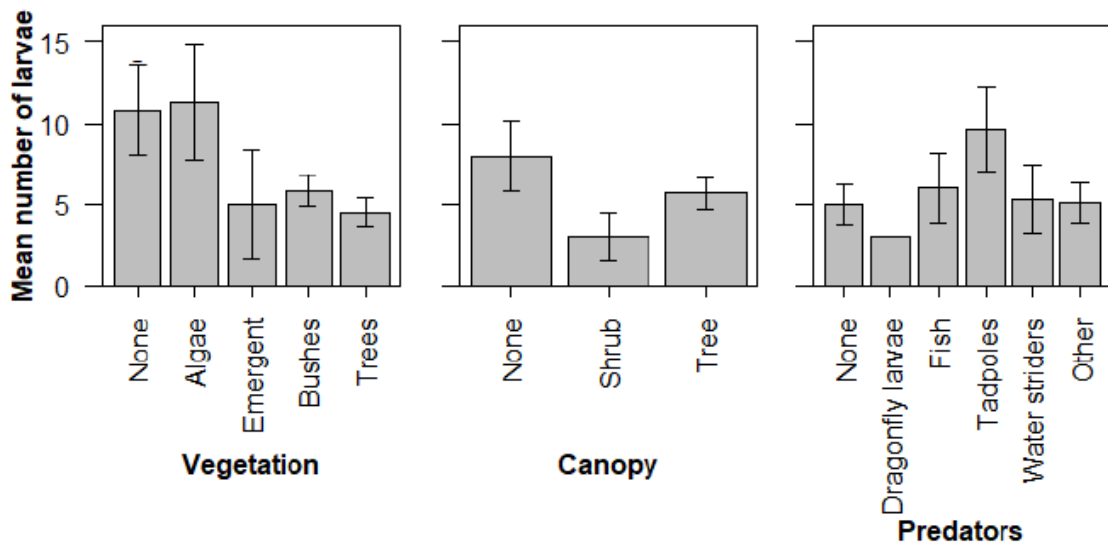

Supplement: MOESM2 [file 17661512]
